# Supplementary material
Source: MDPI journal article supplement (https://www.mdpi.com/2673-4591/6/1/45)
Supplement: s1 [file s1]

# Acetone bio-sniffer (gas-phase biosensor) for monitoring of human volatile using enzymatic reaction of secondary alcohol dehydrogenase

Takahiro Arakawa \*, Ming Ye, Kenta Iitani, Koji Toma, Kohji Mitsubayashi

Tokyo Medical and Dental University

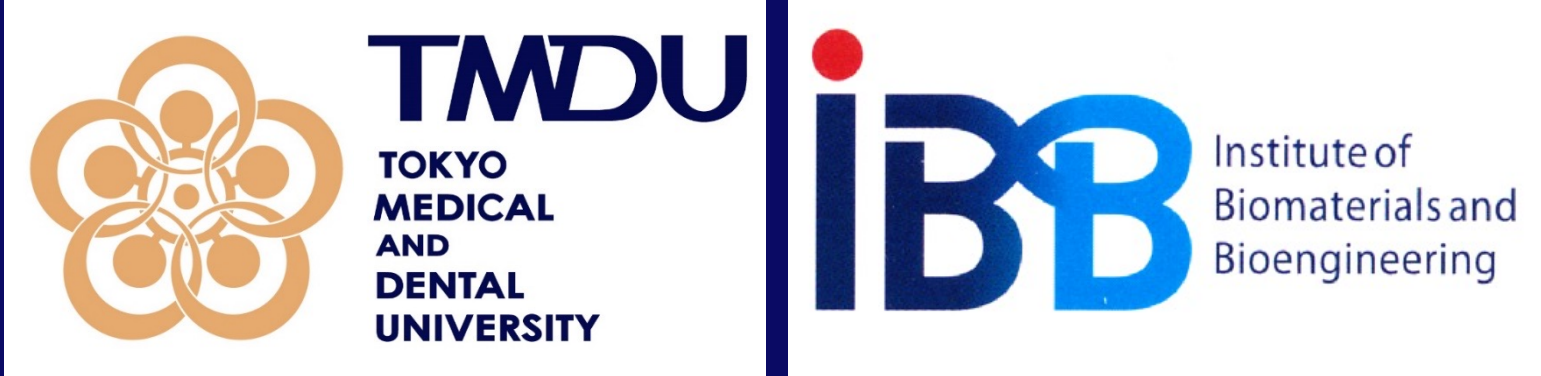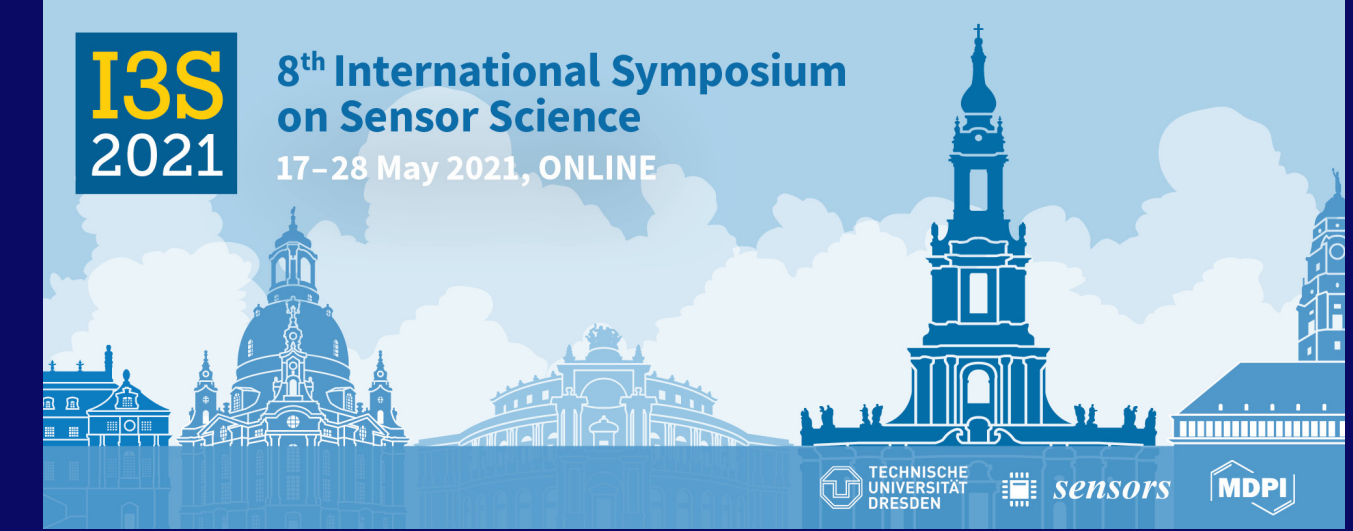

## OBJECTIVES

- Fabrication of fiber-optic biochemical gas sensor (bio-sniffer) for acetone vapor
- Application of the bio-sniffer to measure exhaled breath acetone concentration

## Significance of acetone measurement

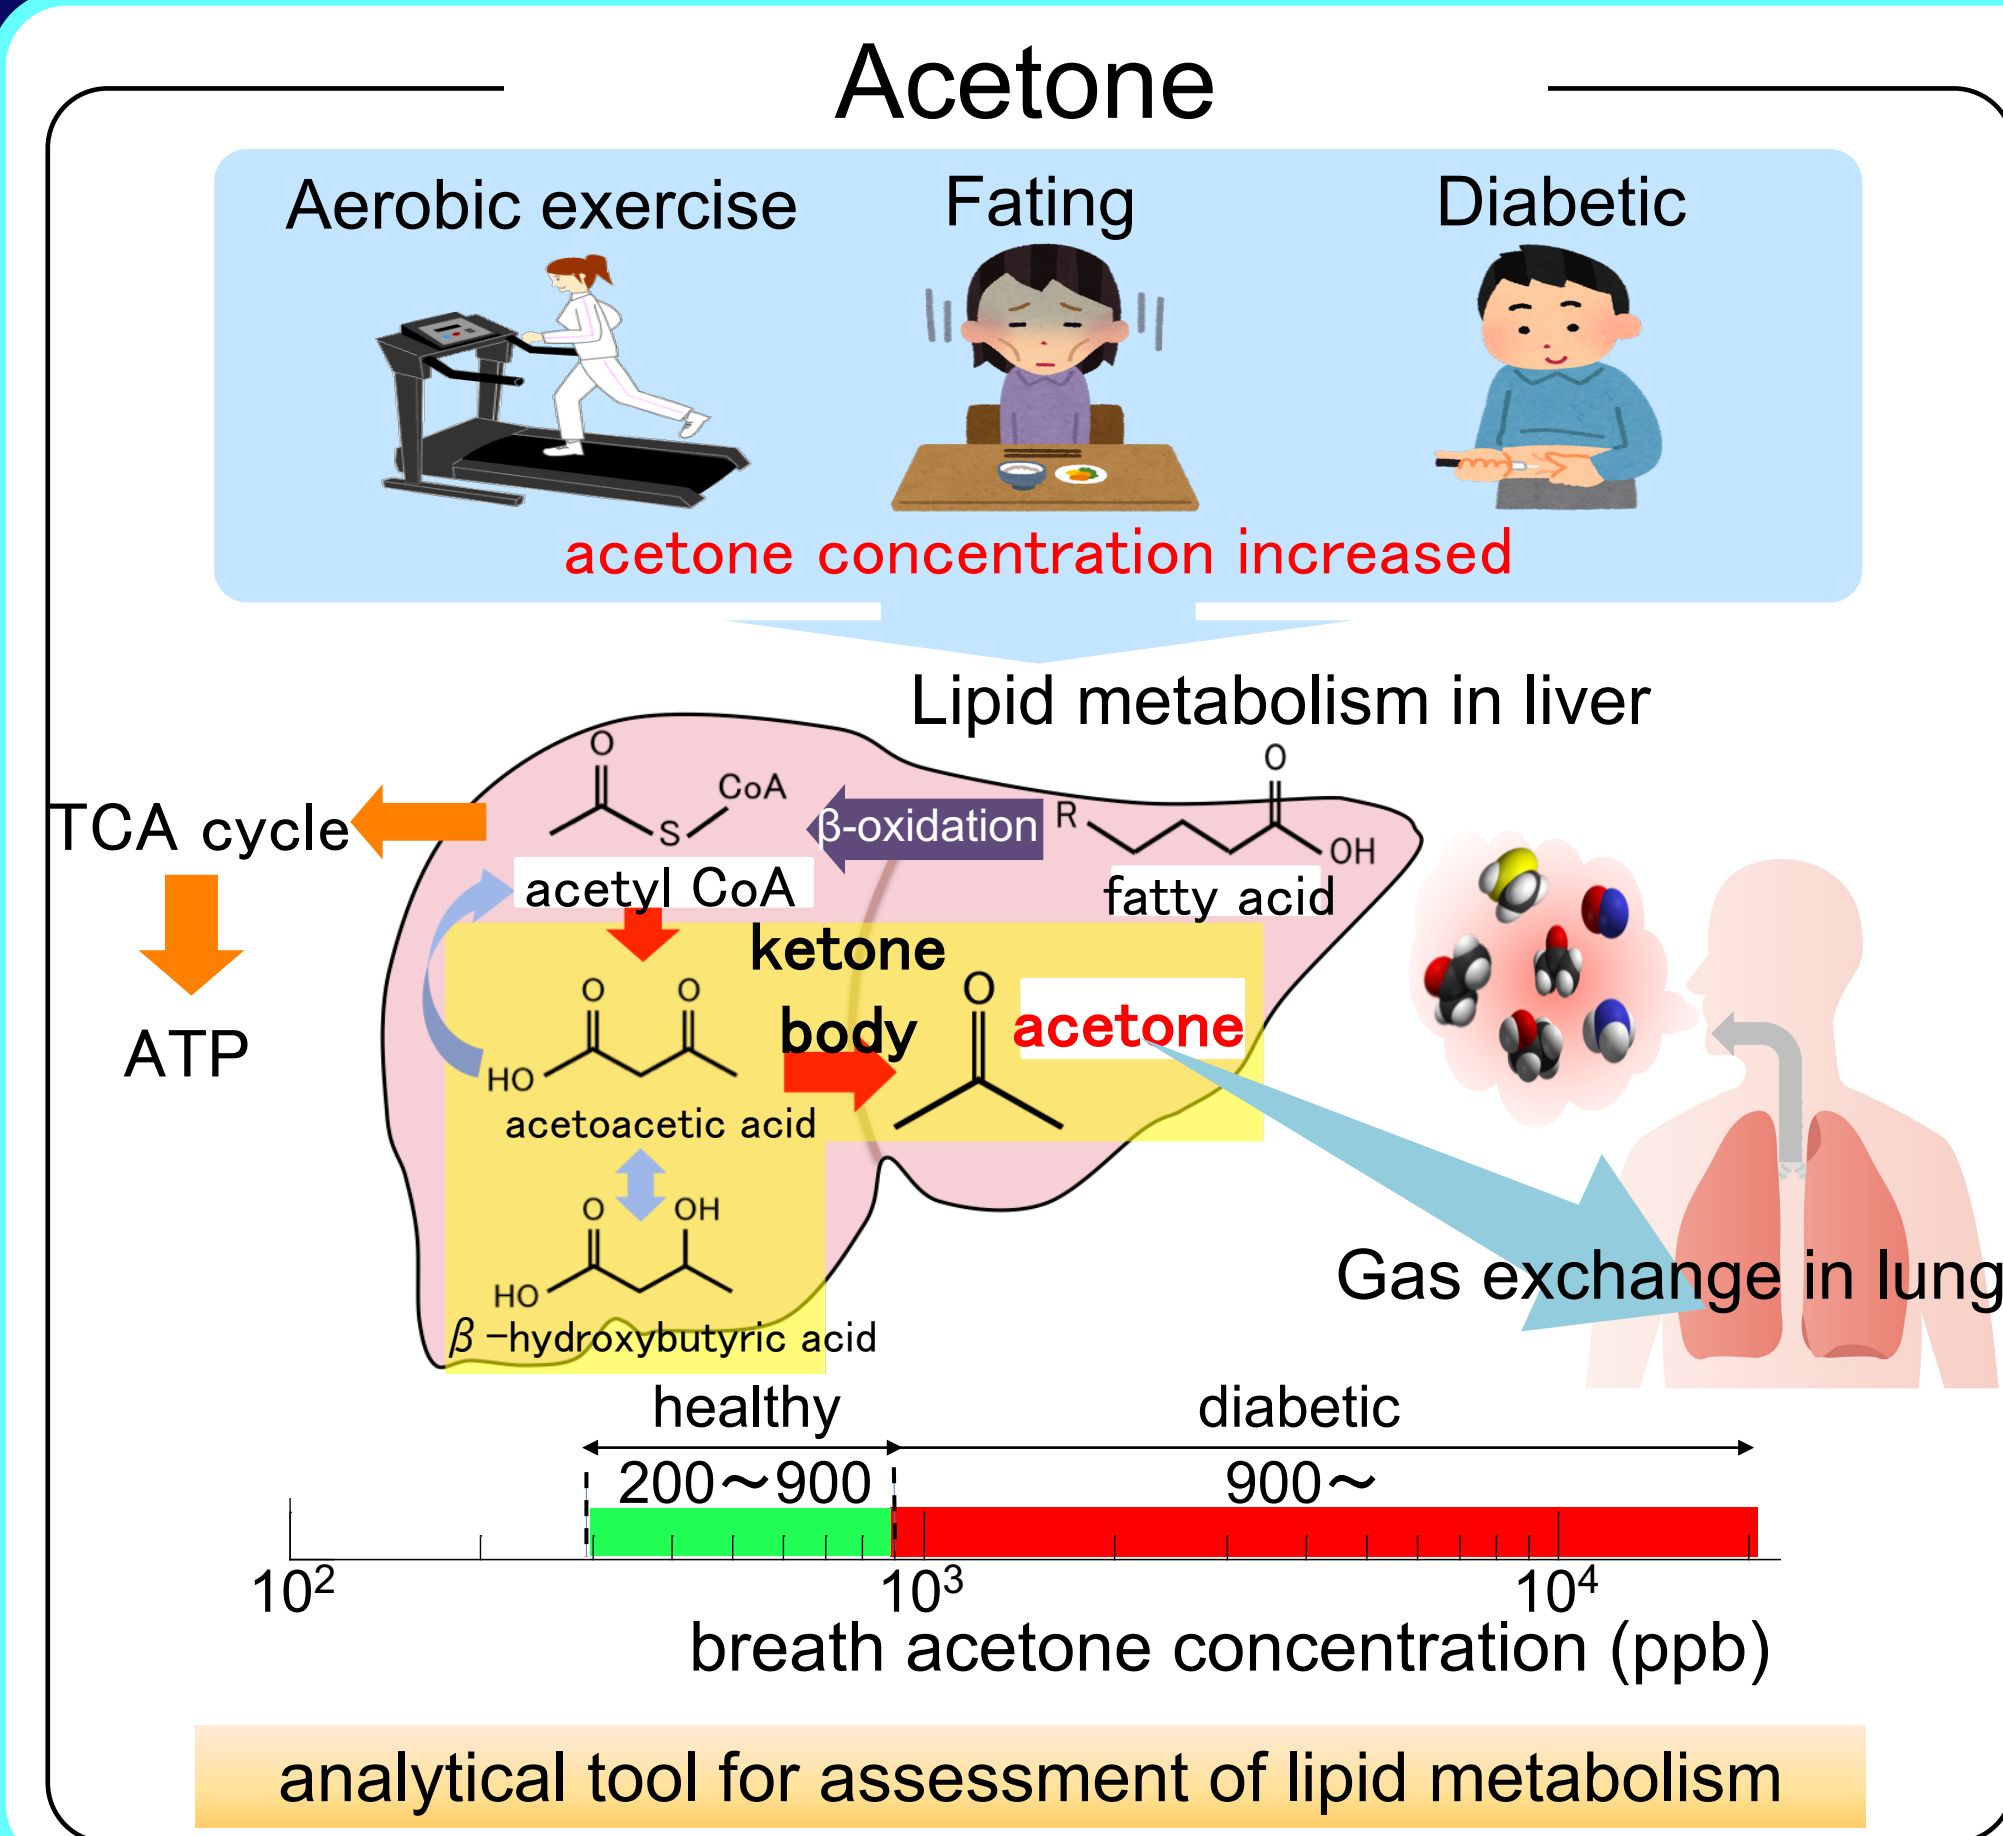

## Conventional methods

| method        | characteristics                            |
|---------------|--------------------------------------------|
| GC-MS         | ○ sensitivity, selectivity<br>× continuity |
| semiconductor | ○ continuity, convenience<br>× selectivity |

simple continuous monitoring with good selectivity

## Biochemical gas sensor for formaldehyde (Bio-sniffer)

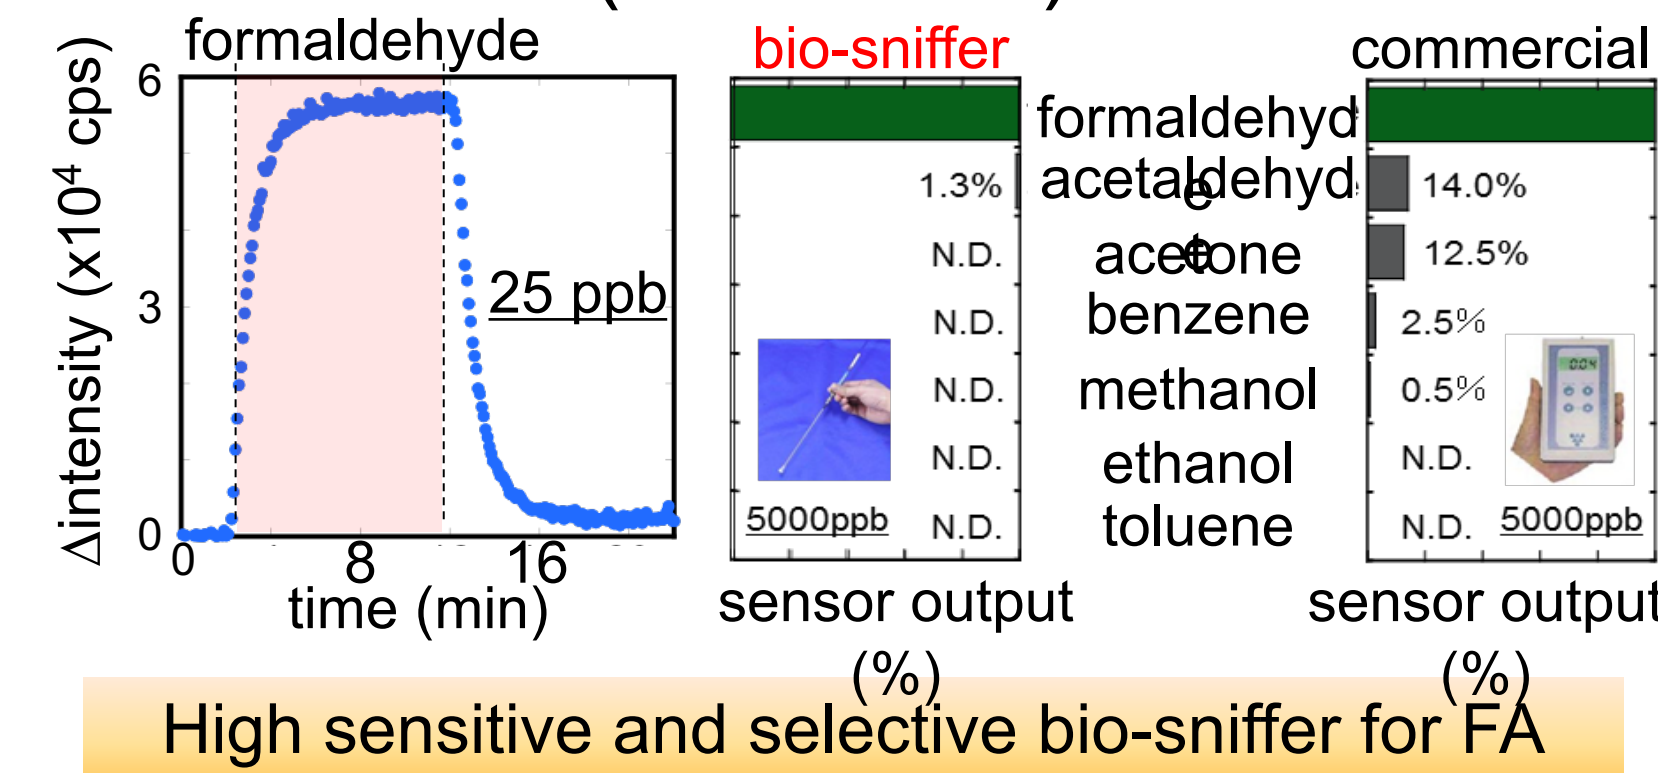

## NADH sensor with photomultiplier

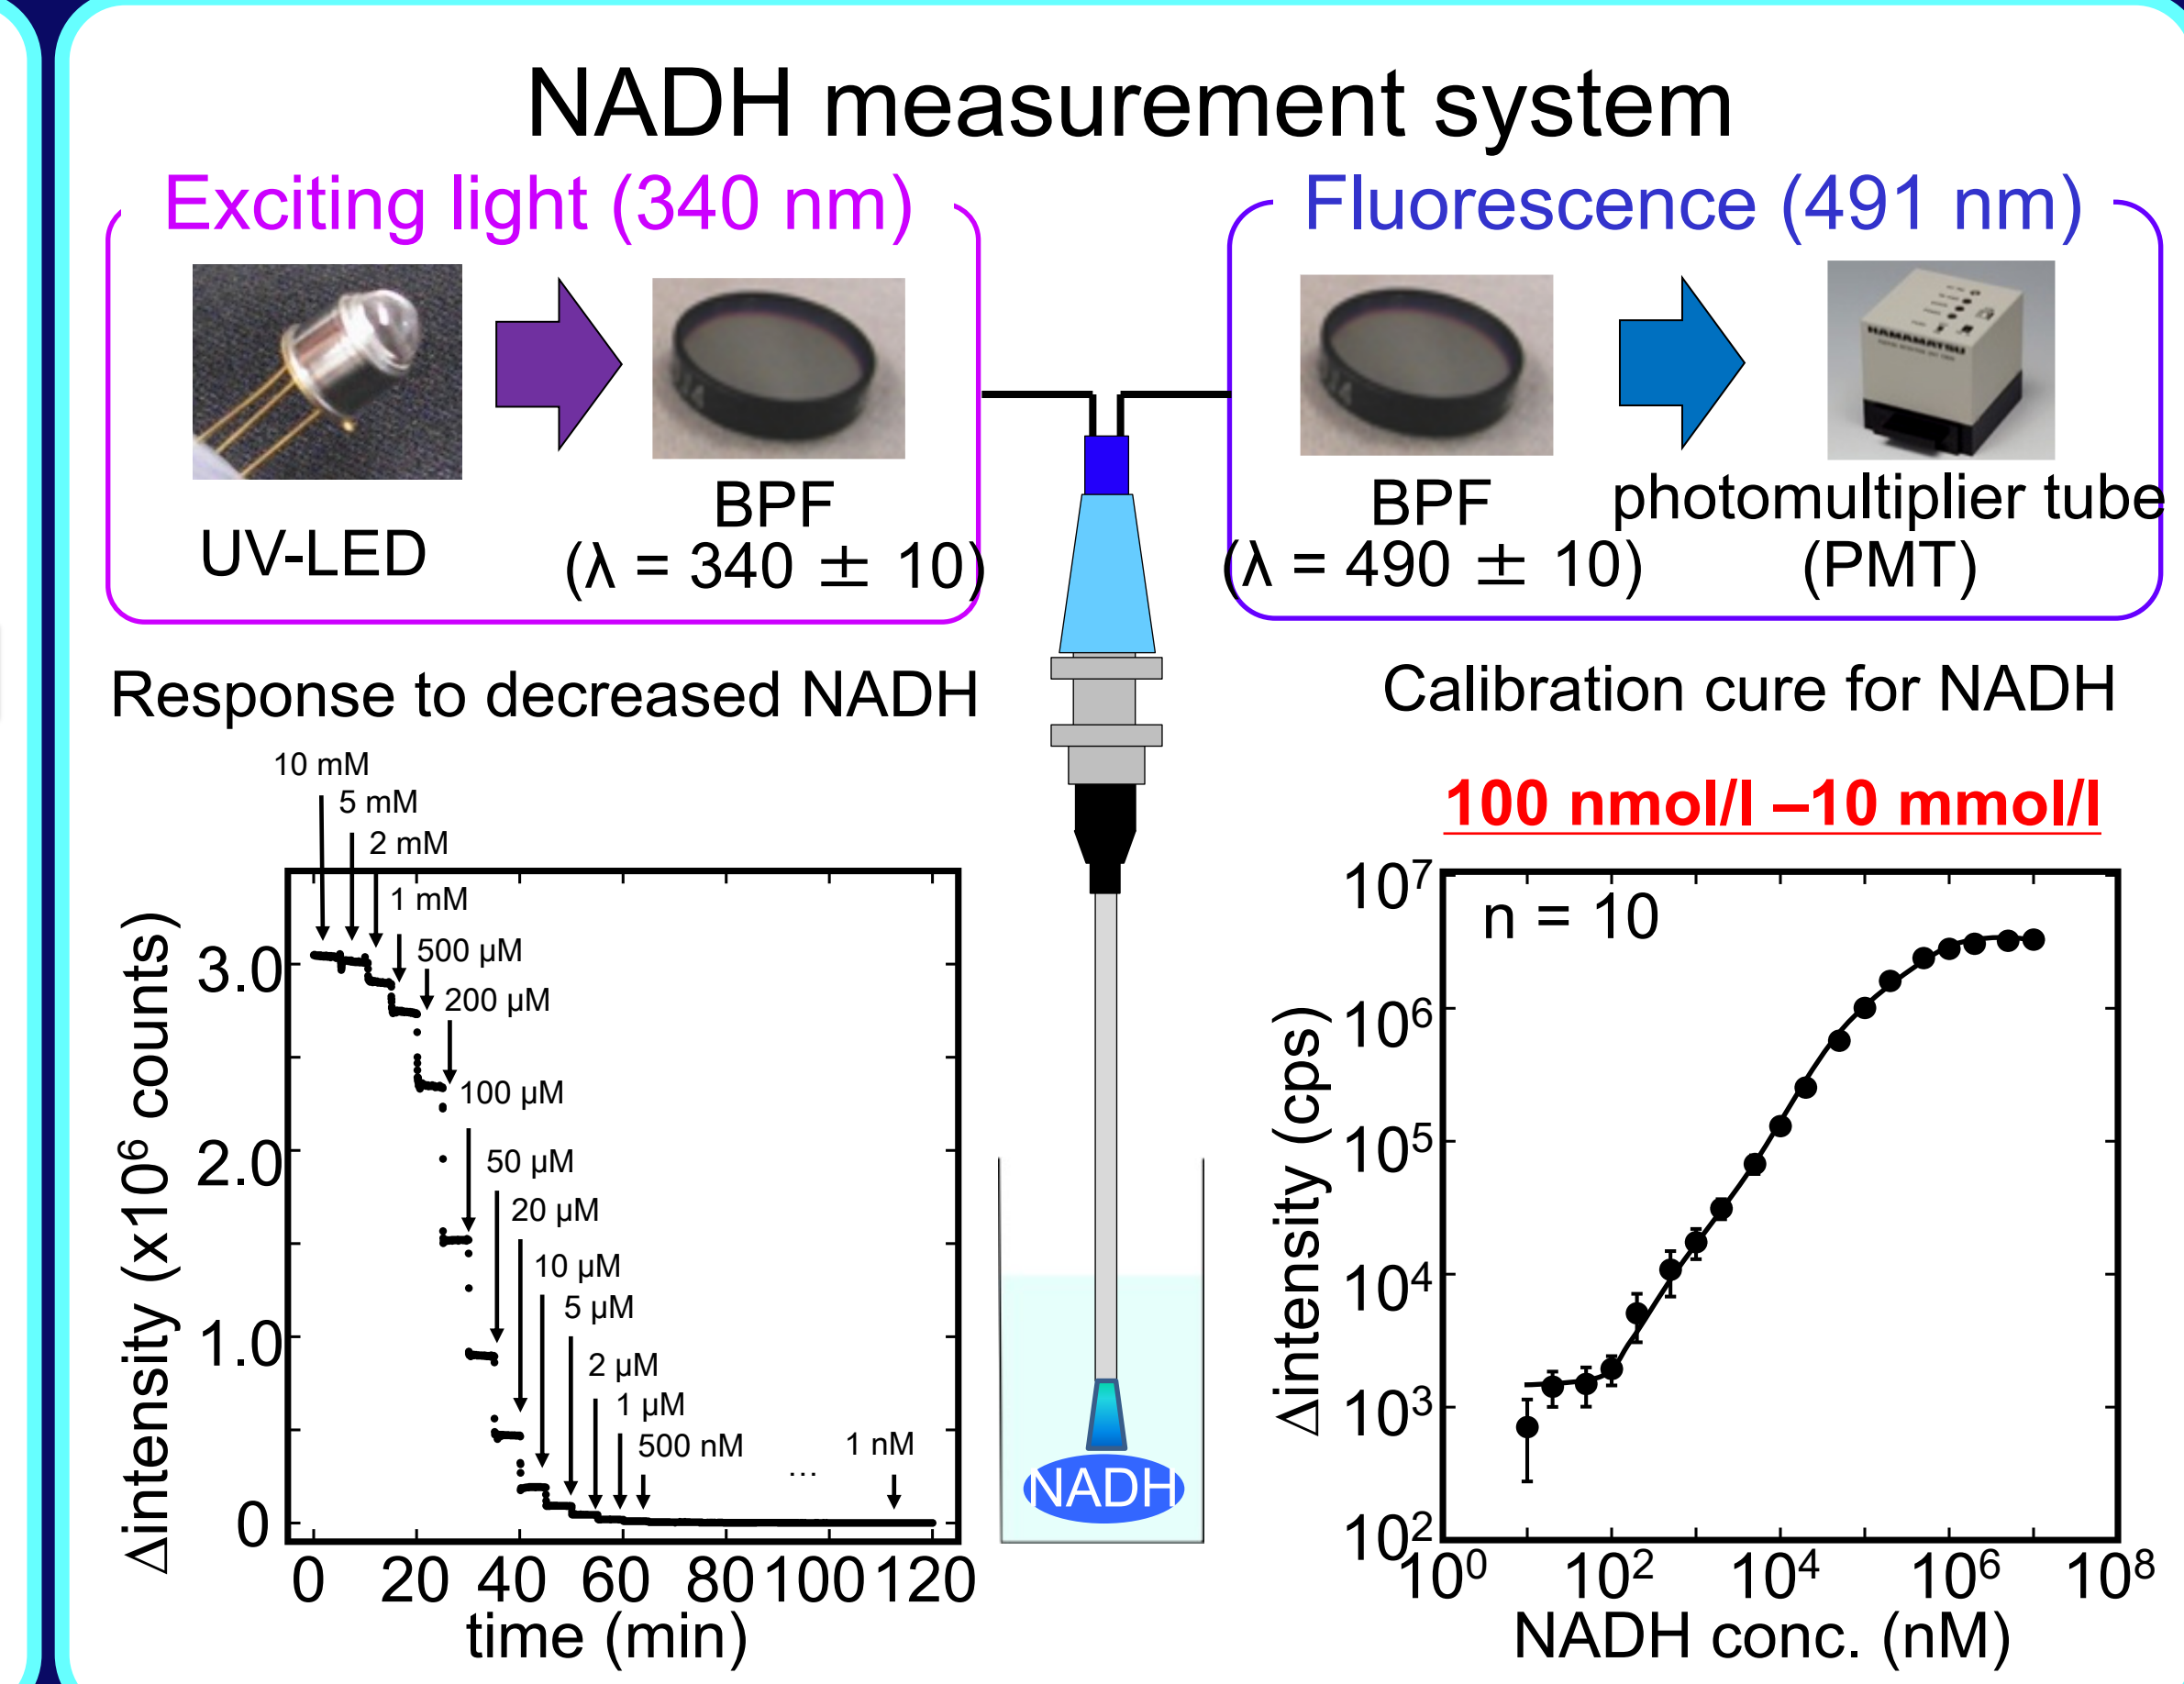

## Fluorometric measurement system with flow-cell for acetone vapor

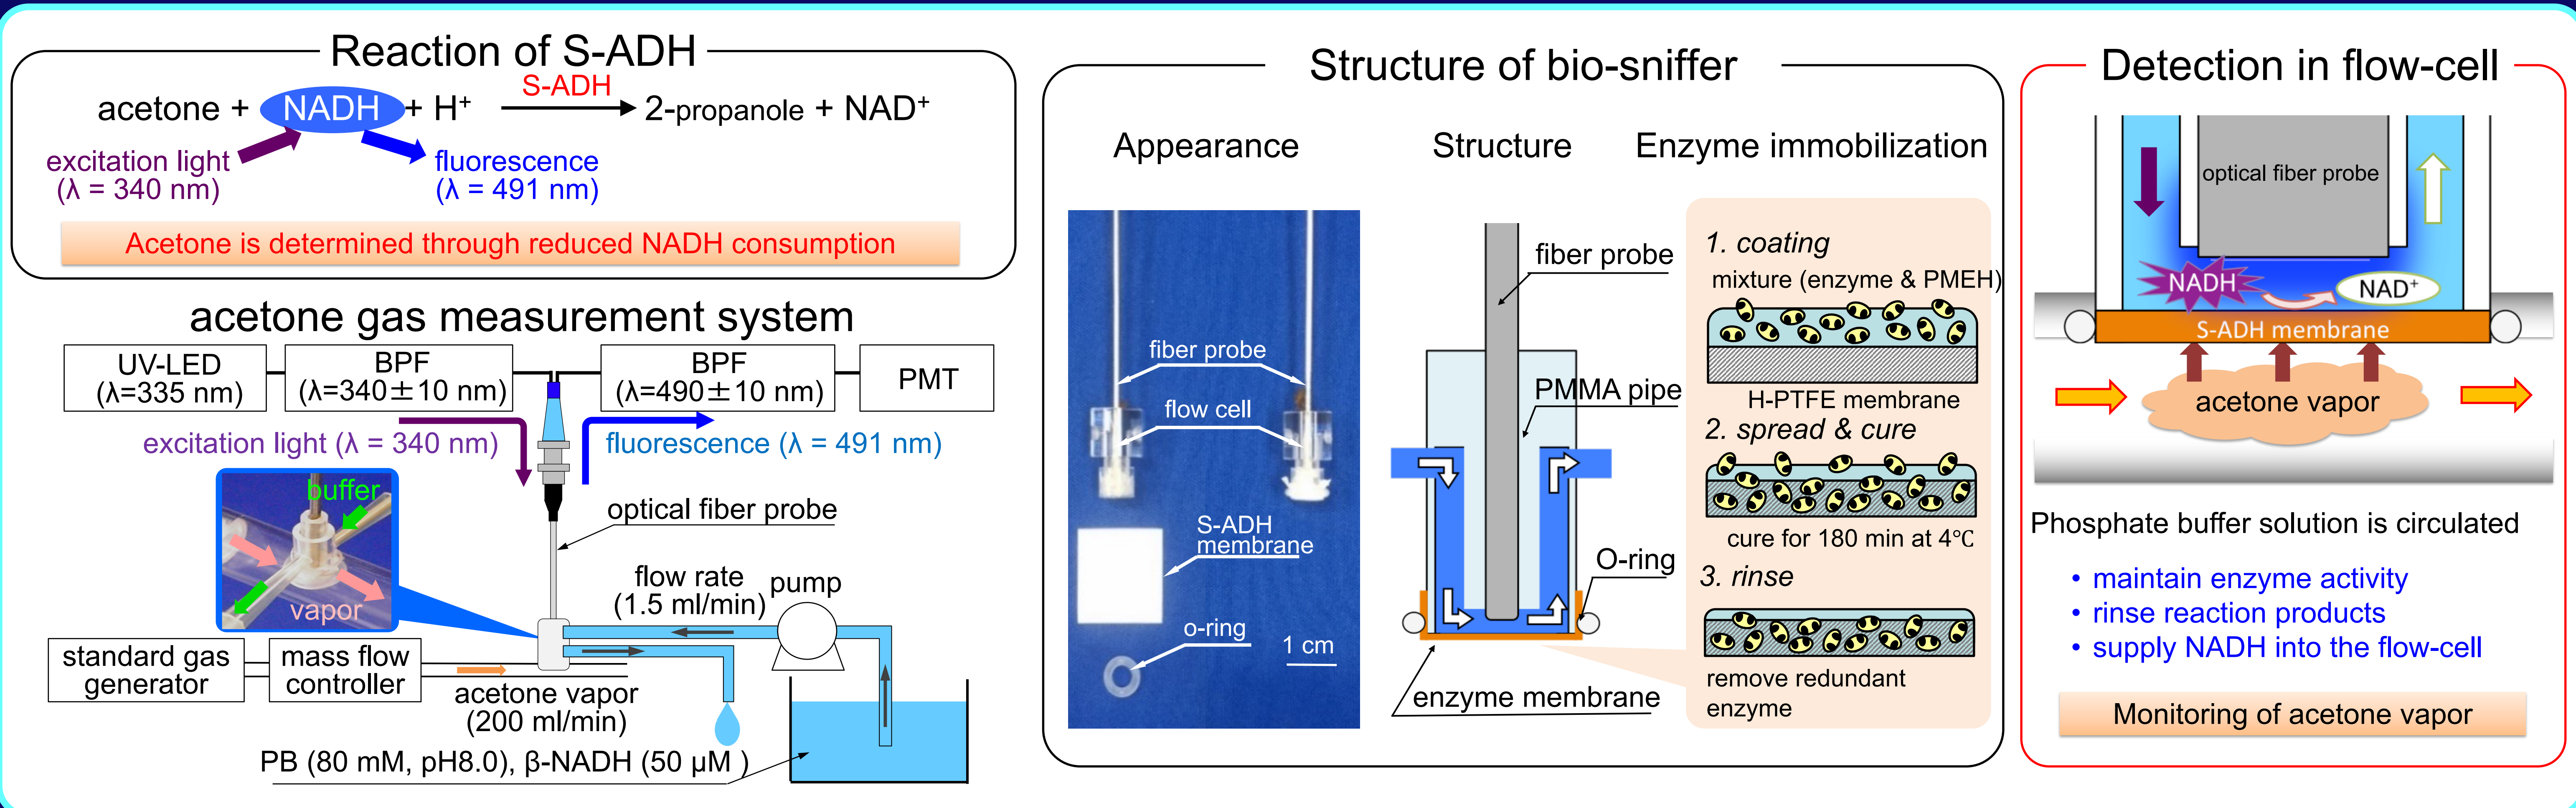

## Characteristics of the acetone bio-sniffer

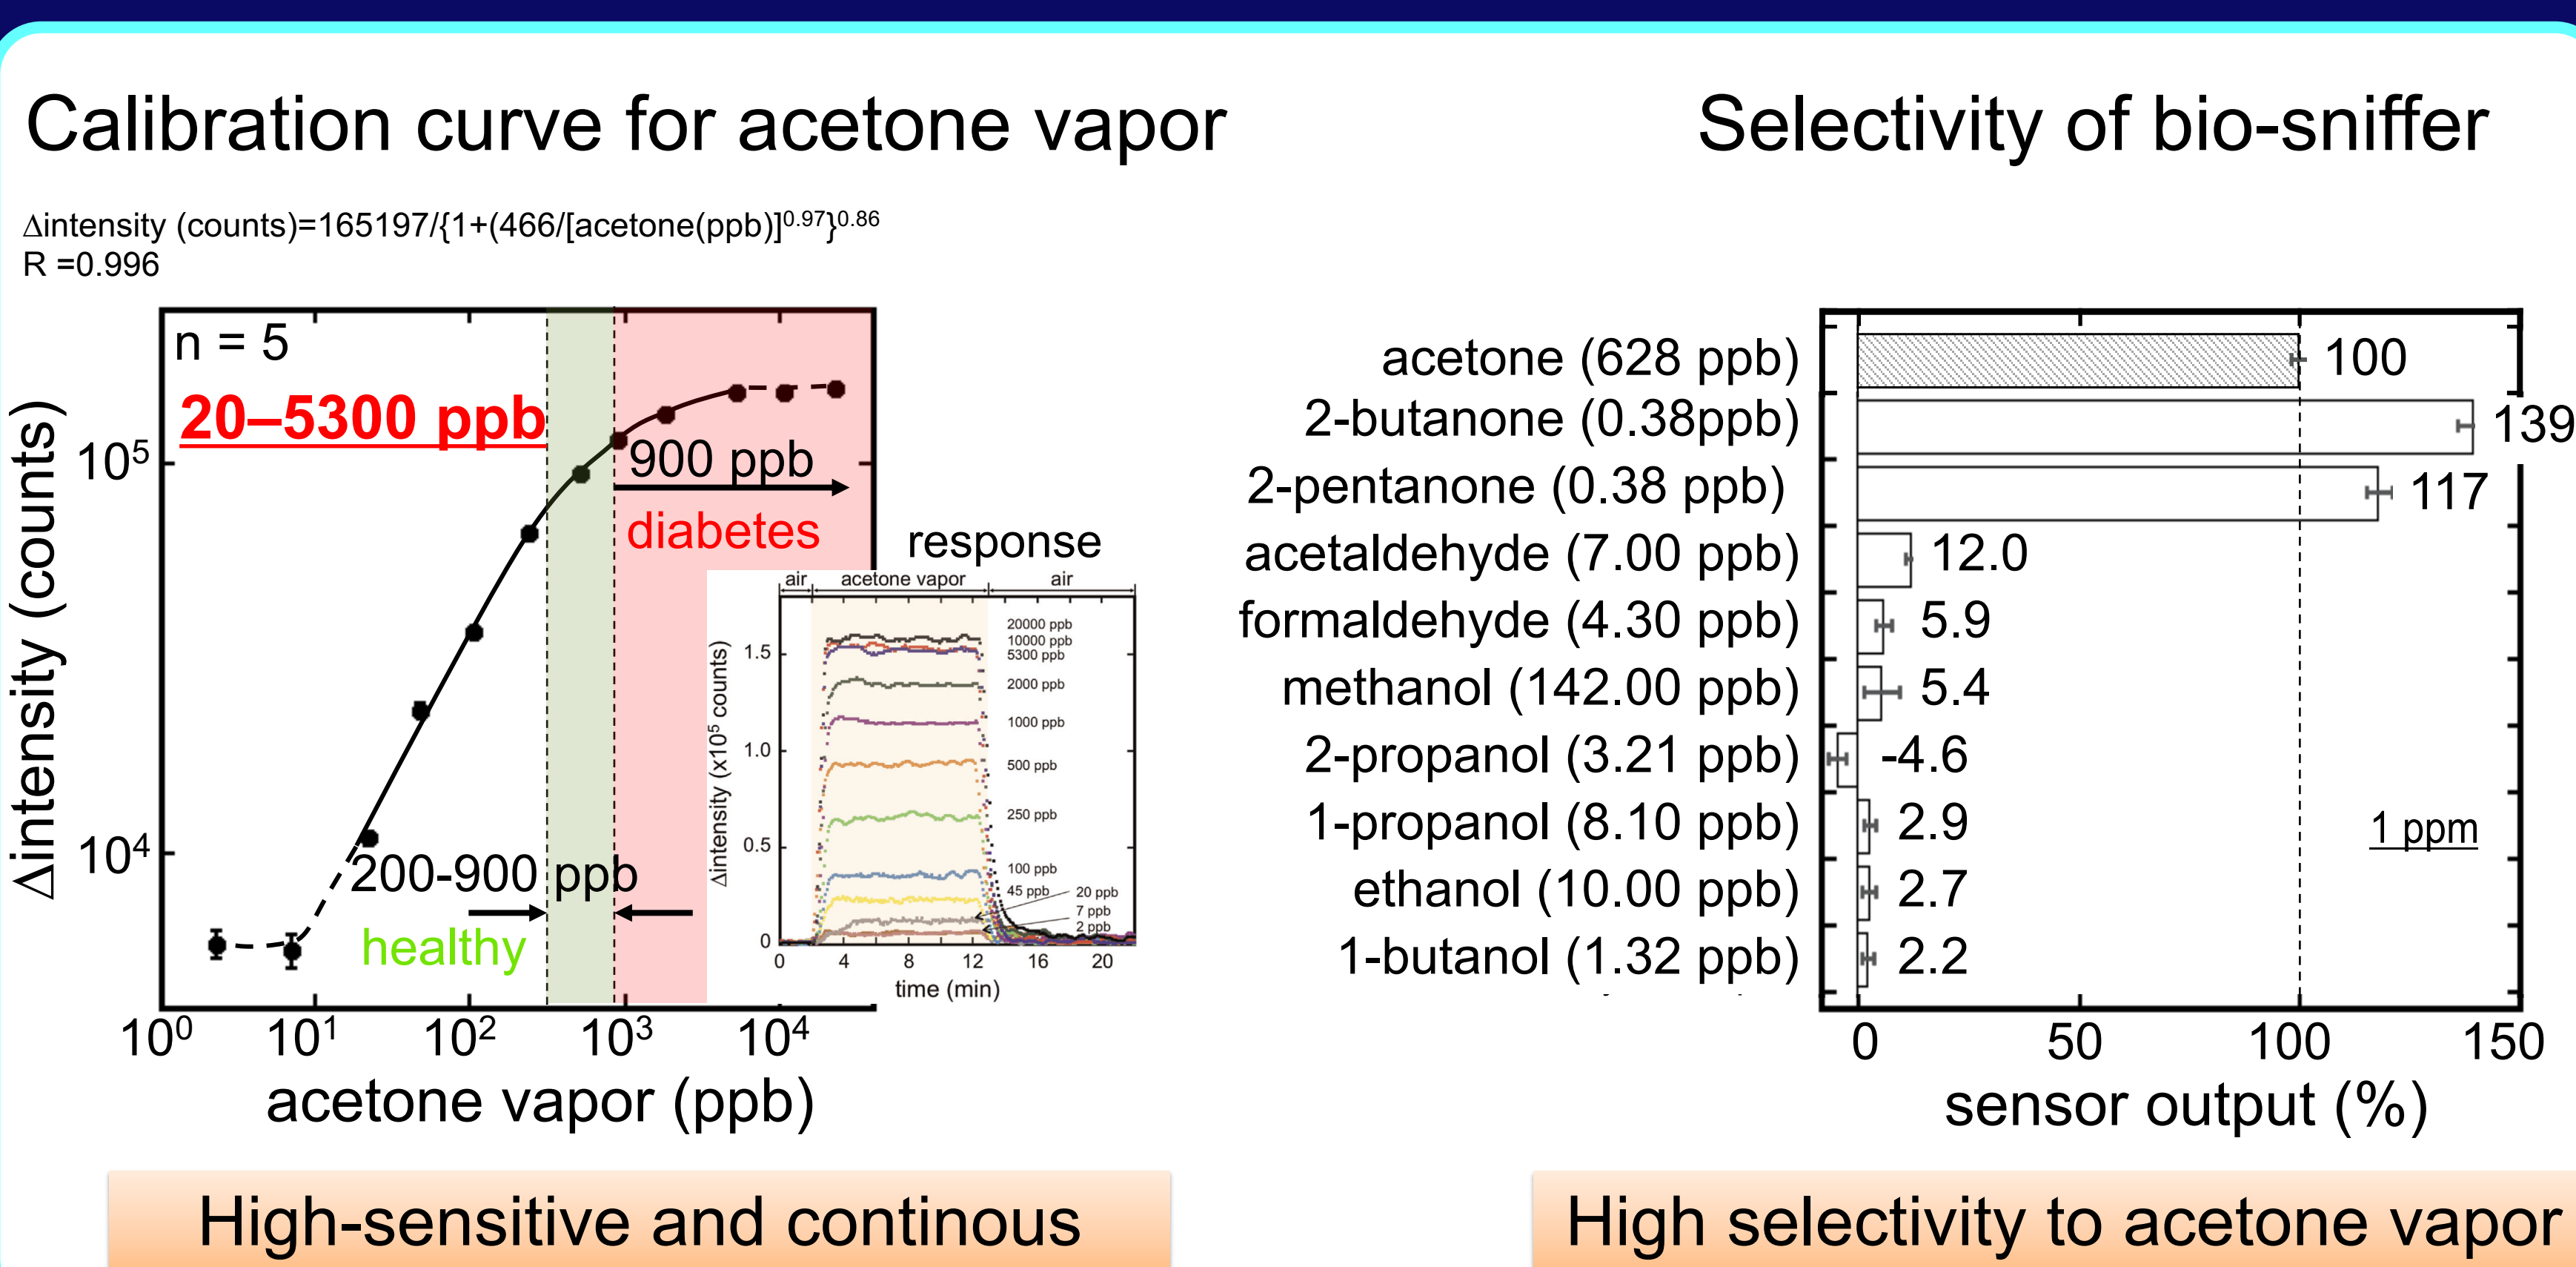

## Assessment of lipid metabolism

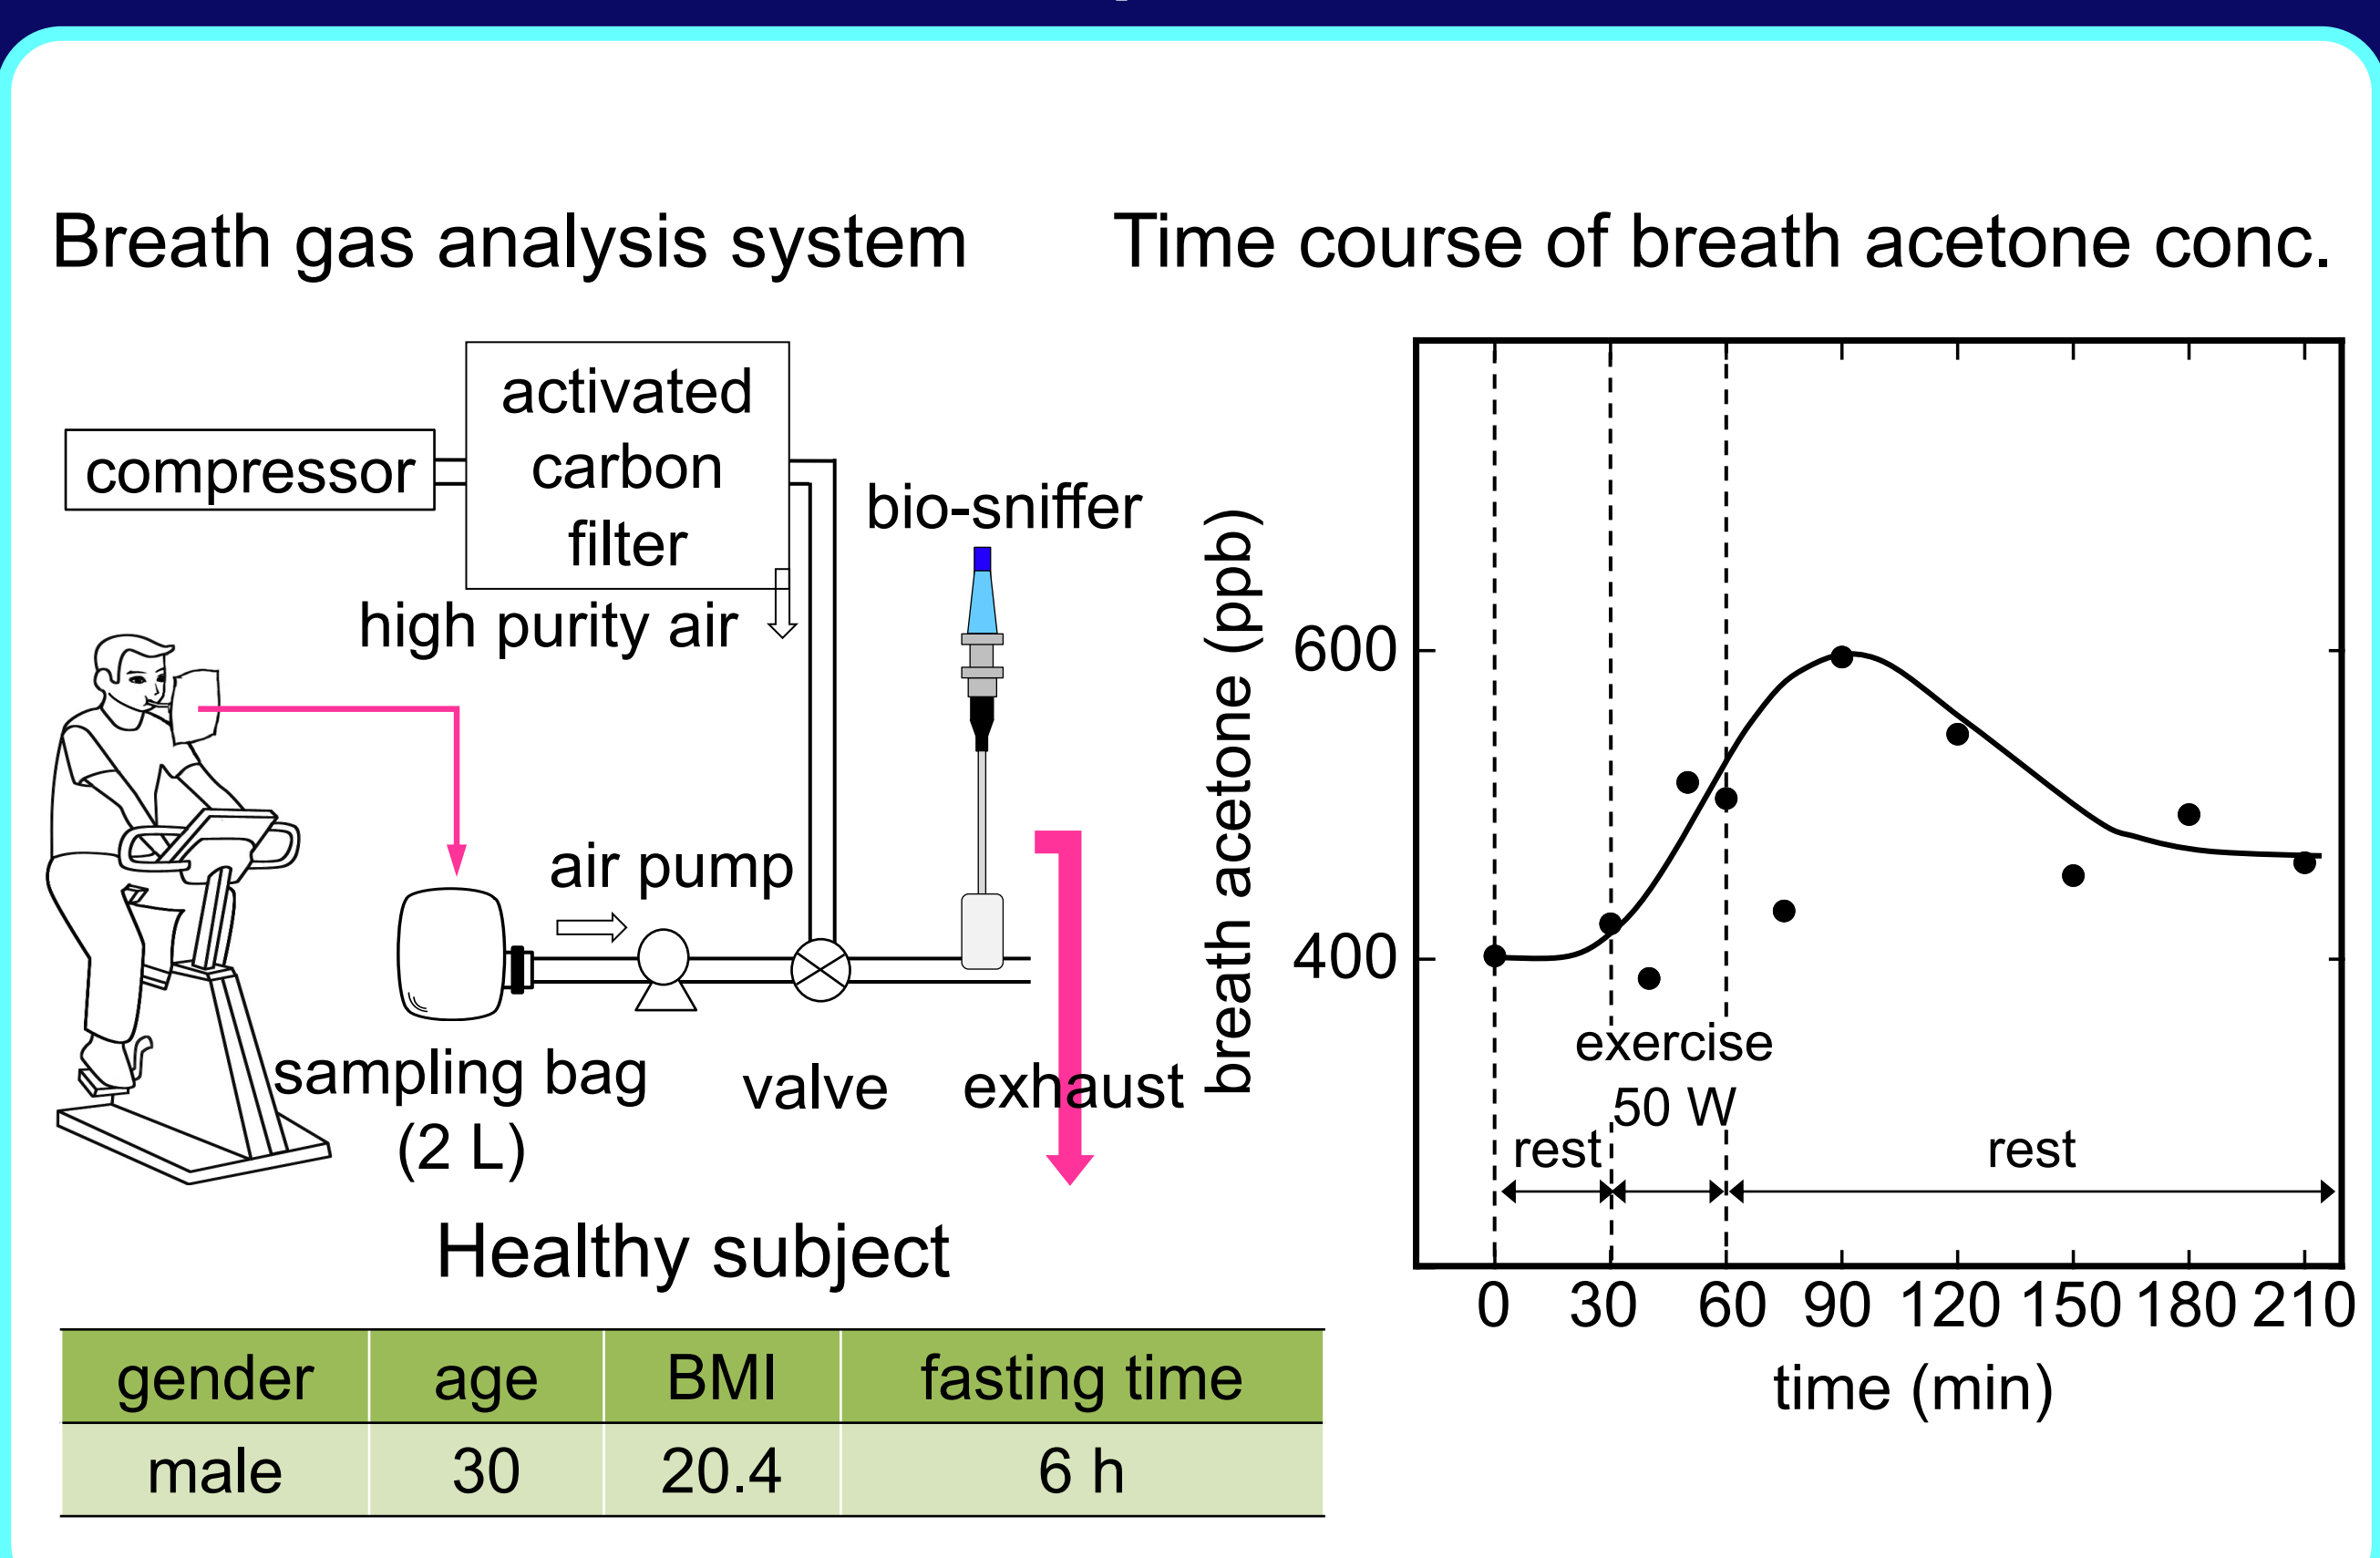

## SUMMARY

- The high-sensitive and high-selective acetone bio-sniffer with flow-cell was constructed  
calibration range : 20–5300 ppb response time (95%): 35-70 s C.V. (500 ppb): 2.62%
- The bio-sniffer was successfully applied to assessment of lipid metabolism
